# Supplementary material for: Deep-learning based spatio-temporal generative model on assessing state-of-health for Li-ion batteries with partially-cycled profiles
Source: Royal Society of Chemistry journal article supplement (doi:10.1039/d3mh00013c), 2023-01-01
Supplement: d3mh00013c1.pdf [file d3mh00013c1.pdf]

## Supporting Information

### Supplementary Note 1. Conventional machine learning framework for Li-ion battery SOH estimation

In this section, the working process of the conventional machine learning framework will be described in detail.

#### 1.1 Data preprocessing and feature extraction

Battery degradation is a complex result of various mechanisms such as formation of the SEI layer and Li-plating. However, there are limitations to estimating battery health from the mechanisms because they occur inside the battery cell. Therefore, a phenomenological approach based on the features expressed in measurable parameters, such as voltage, capacity, and temperature, is required. Many researches have noted a pattern in cycling profiles with battery aging. For example, the initial voltage of discharge decreases and the peak of the charge IC curve shifts as cycling progresses, as shown in **Supplementary Fig. S4-S6**. Therefore, to analyze D-GELS performance comparatively, we analyzed the salient patterns of profiles. 35 features were extracted as battery health indicators to construct conventional frameworks (**Supplementary Table 2**). The 35 features are categorized into three groups, voltage-related features, cell surface temperature-related features, and incremental capacity-related features. Some of the extracted features are closely related to battery aging, but there will also be features that have no relation or are negligible. They not only increase computational cost but can also cause overfitting problems. Therefore, the process of selecting the optimal feature set is necessary.

#### 1.2 Feature selection

In this paper, four feature selection strategies are concerned: Filter method, Feature Selector, PCA, and ElasticNet (**Supplementary Table 3**). Firstly, the filter method was set the threshold as 0.05 to remove quasi-constant features with *VarianceThreshold()* function in *sklearn.feature\_selection*, and the Pearson correlation as 0.7 to remove correlated features with *corr()* function in *Pandas*. The remained 10 features were selected. The Feature Selector was set the parameters 'missing\_threshold' as '0.6', 'correlation\_threshold' as '0.98', 'task' as 'regression', 'eval\_metric' as 'auc', and 'cumulative\_importance' as '0.98'. The remaining 7 features were selected. In the PCA method, the feature eigenvalues were sorted and top 8 features were selected because the cumulated explained variance ratio is over 0.9 after the 8th eigenvalue. The PCA was processed with *PCA* library of *sklearn.decomposition*. Finally, the ElasticNet was set the parameters 'alpha' as '0.3' with the optimizing process using *ElasticNetCV()* in *sklearn.linear\_model*. And 6 features were selected.

The K-Nearest Neighbor (KNN) model is used as the basic SOH prediction model to find out the optimal feature set. The parameter was set 'n\_neighbors' as '5', 'metric' as 'minkowski', and 'weights' as 'uniform' (**Supplementary Table 3**). As a result, the feature set which was selected by the Feature selector has the best performance, 0.005196 of RMSE.

#### 1.3 Compared SOH estimation performance with D-GELS

In this section, the 7 feature set which was selected with Feature Selector was fed into four machine learning models to estimate SOH: GPR, SGD, RF, NuSVR. The GPR are set 'alphah' as '0.01' with *GaussianProcessRegressor()* in *sklearn.gaussian\_process*. The SGD are set with default parameters with *SGDClassifier()* in *sklearn.linear\_model*. The RF was set 'max\_depth'

as '10', 'random\_state' = '0' with *RandomForestRegressor()* in *sklearn.ensemble*. And the NuSVR are set 'kernel' as 'linear', 'C' as '1.0', 'gamma' as 'auto'.

After the models were trained, performance degradation was compared with D-GELS when the training dataset (25°C) and the test dataset (15°C and 35°C) have different cycling temperature conditions (**Supplementary Table 4**).

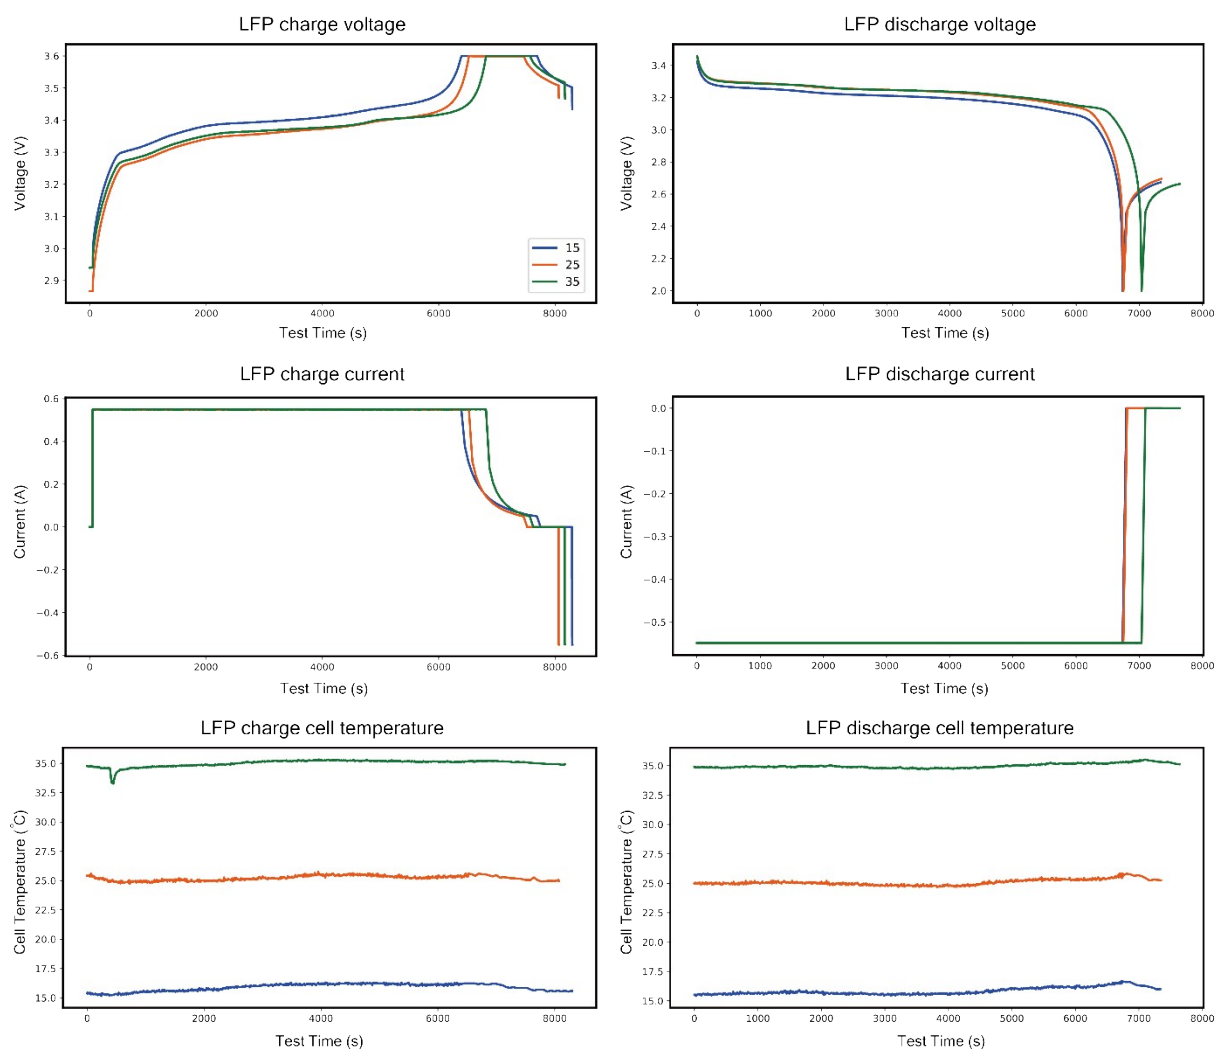

**Supplementary Fig. 1. The initial cycling curves of a battery with LFP cathode material cycled at environmental temperatures of 15°C, 25°C, and 35°C. The voltage, current, and cell temperature profiles at 25°C were used for D-GELS training, and the cycling data at 15°C and 35°C were used for applicability evaluation.**

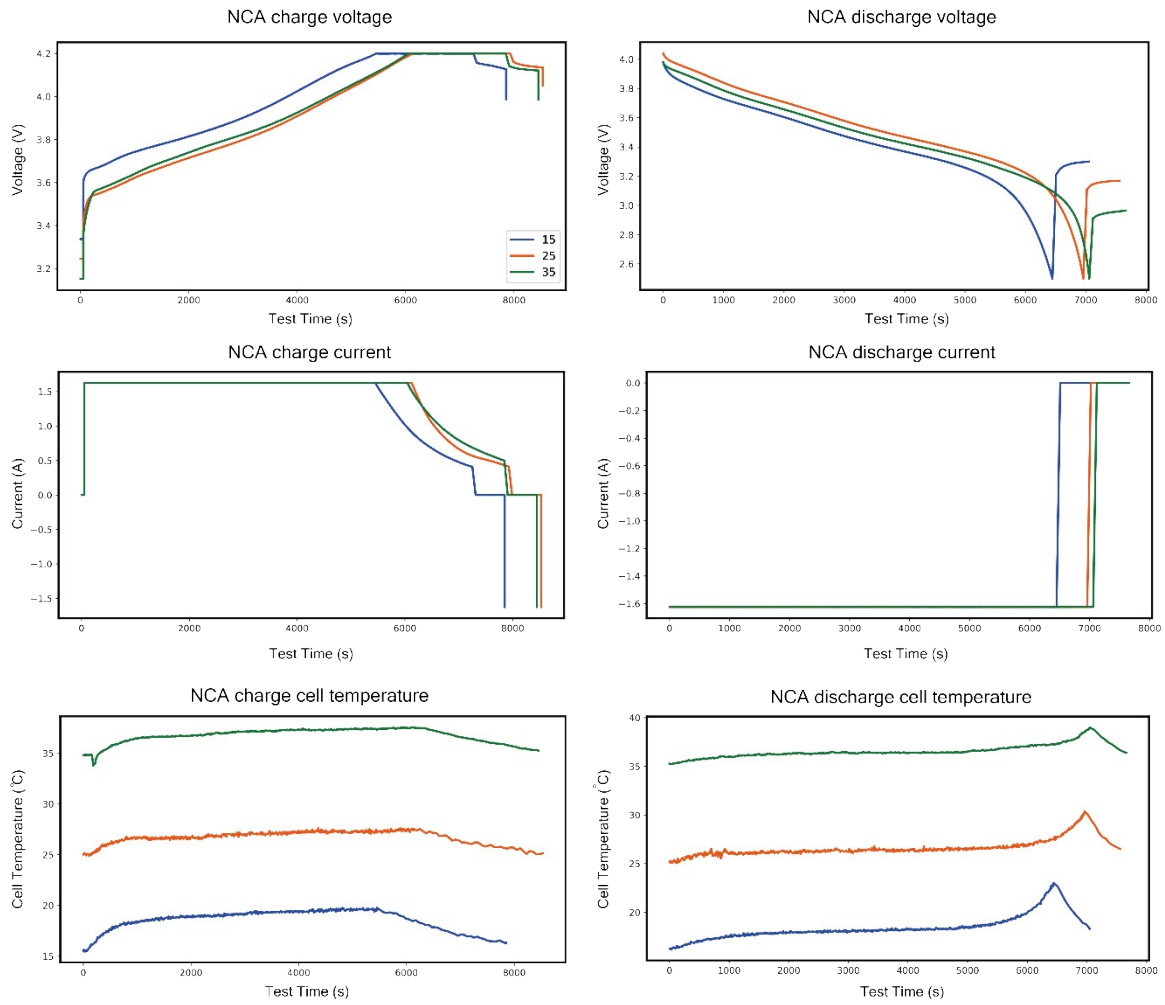

**Supplementary Fig. 2. The initial cycling curves of a battery with NCA cathode material cycled at environmental temperatures of 15°C, 25°C, and 35°C. The voltage, current, and cell temperature profiles at 25°C were used for D-GELS training, and the cycling data at 15°C and 35°C were used for applicability evaluation.**

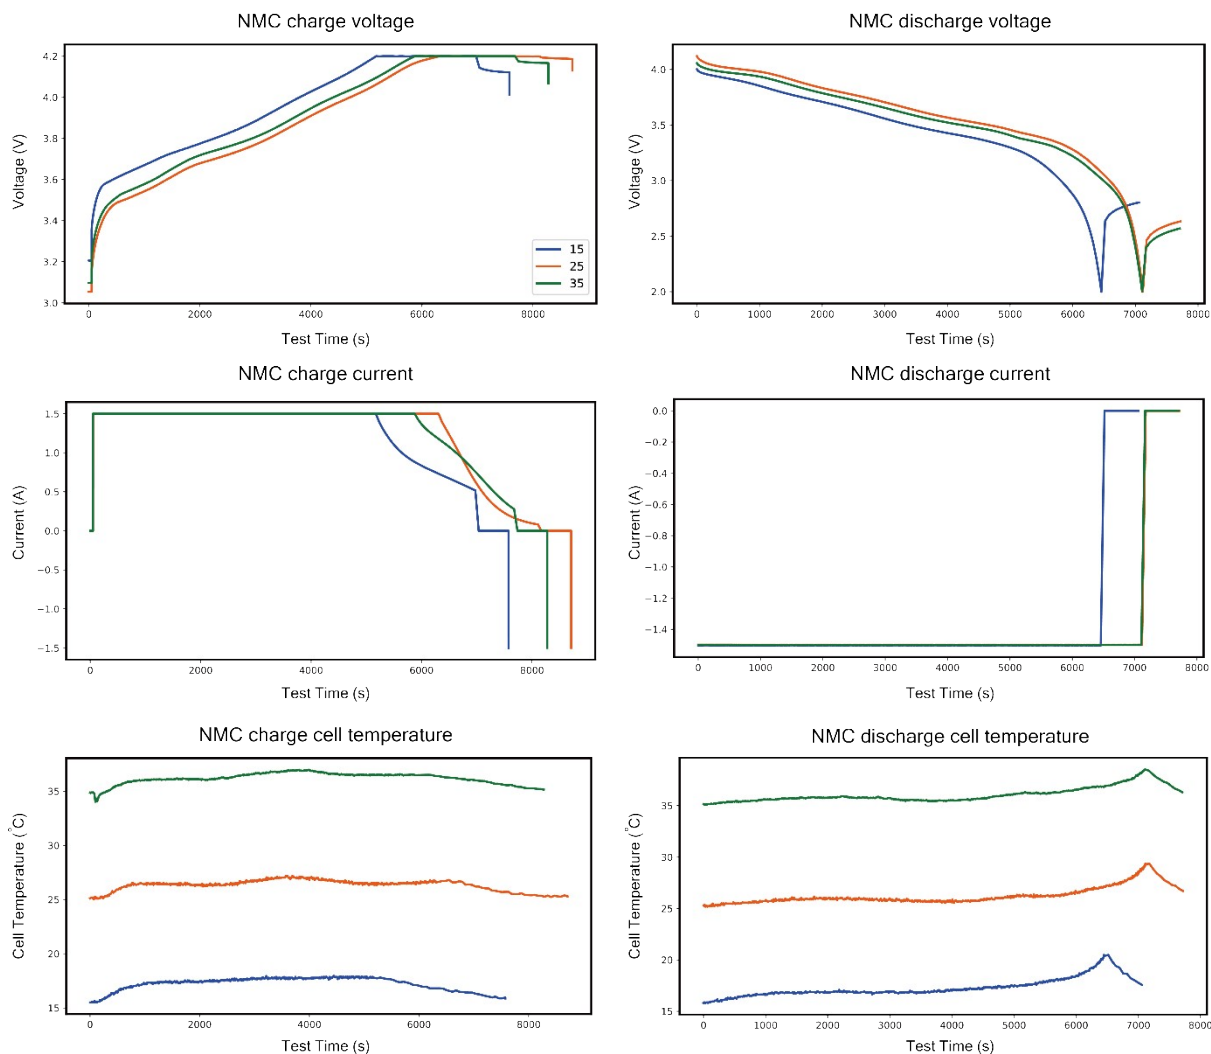

**Supplementary Fig. 3. The initial cycling curves of a battery with NMC cathode material cycled at environmental temperatures of 15°C, 25°C, and 35°C. The voltage, current, and cell temperature profiles at 25°C were used for D-GELS training, and the cycling data at 15°C and 35°C were used for applicability evaluation.**

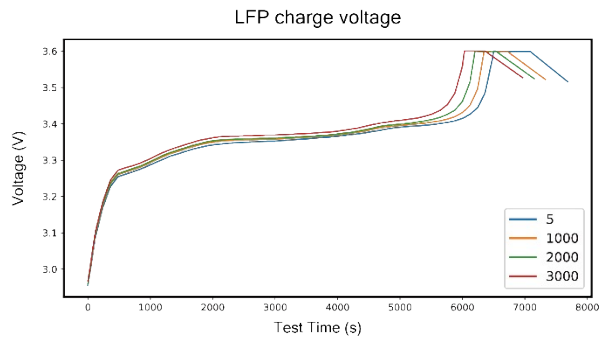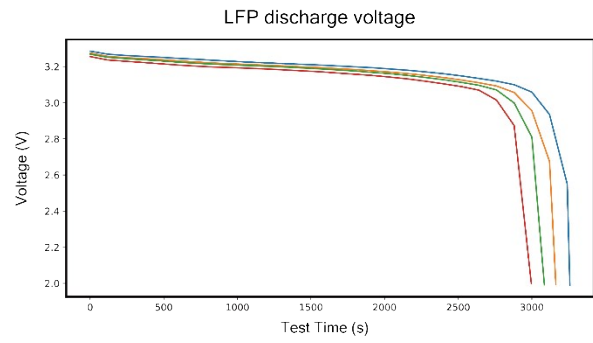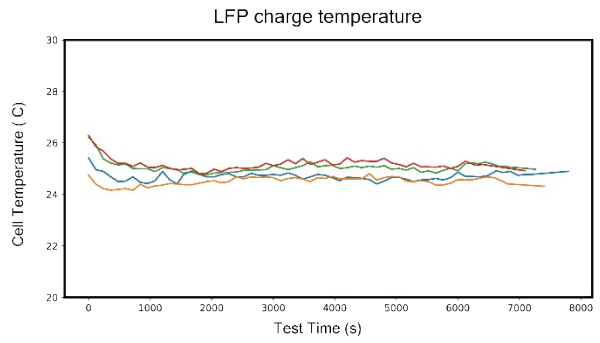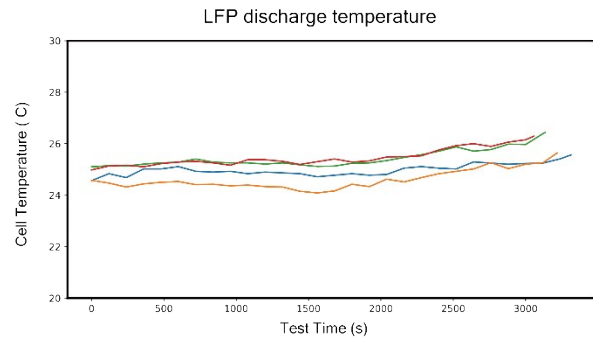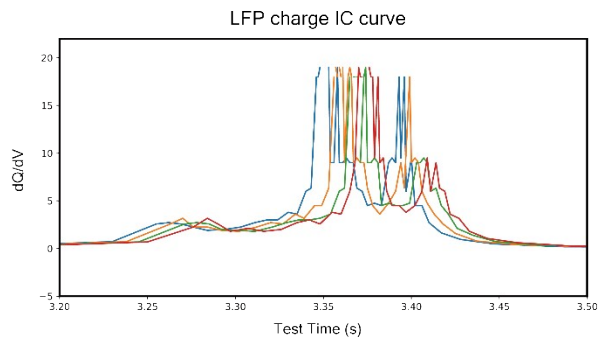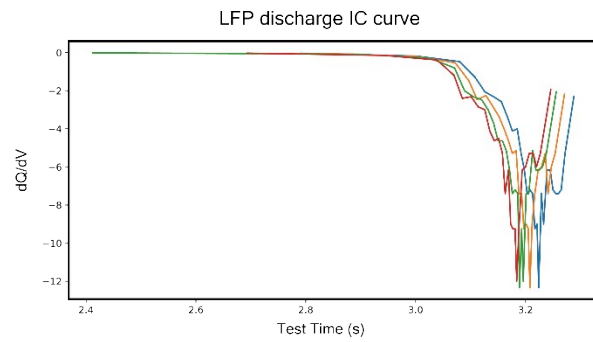

**Supplementary Fig. 4. The voltage, cell temperature, and IC curves of battery cycling with LFP cathodes at 5, 1000, 2000, and 3000 cycles.**

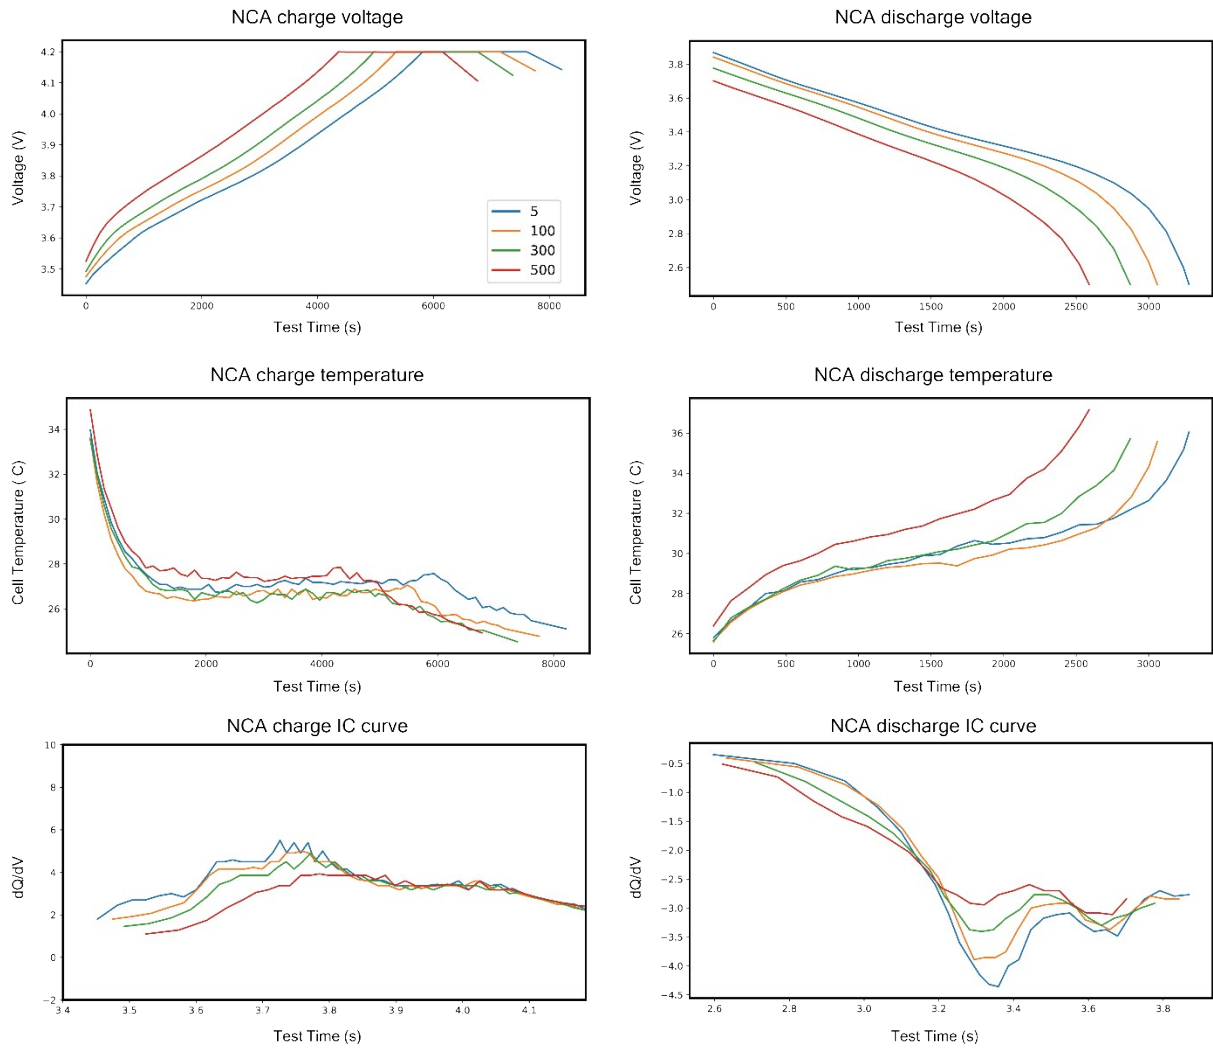

**Supplementary Fig. 5. The voltage, cell temperature, and IC curves of battery cycling with NCA cathodes at 5, 100, 300, and 500 cycles.**

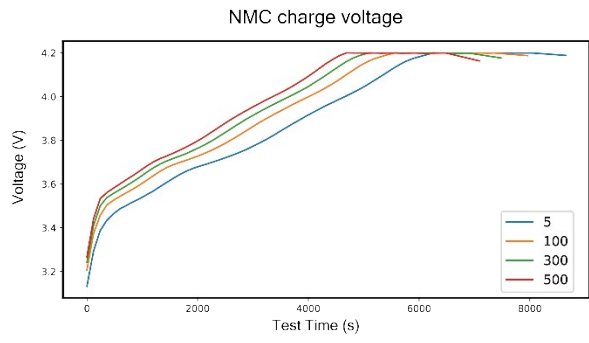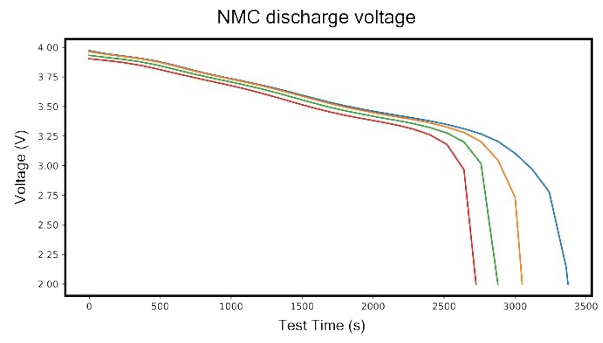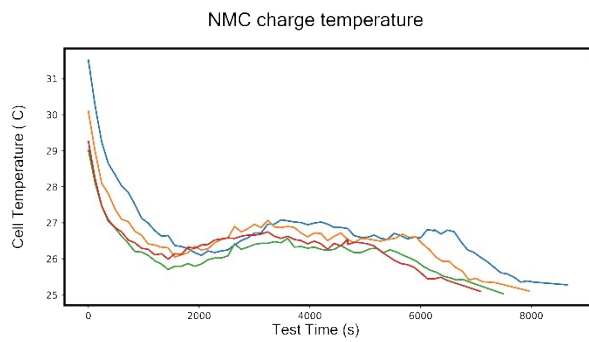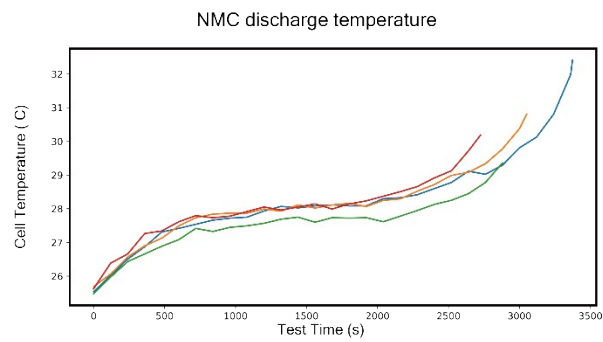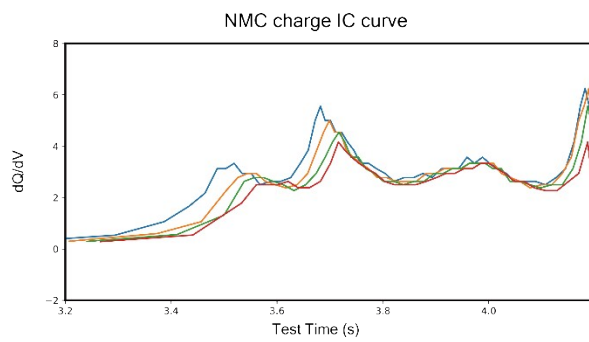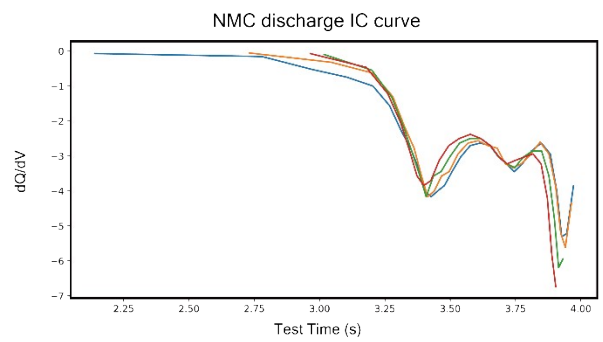

**Supplementary Fig. 6. The voltage, cell temperature, and IC curves of battery cycling with NMC cathodes at 5, 100, 300, and 500 cycles.**



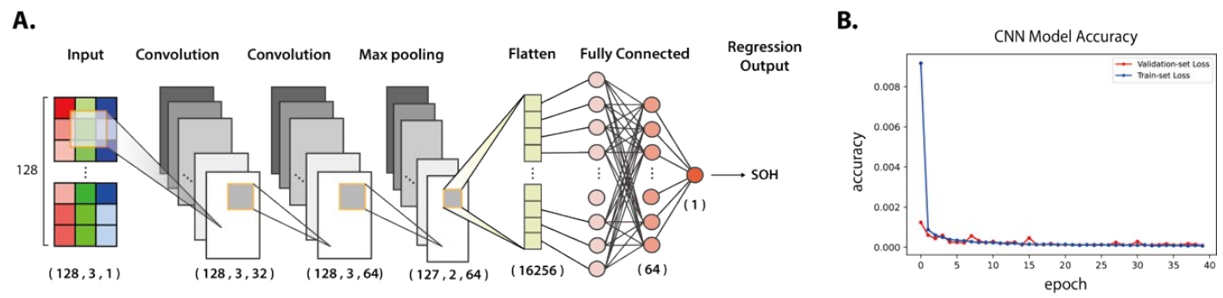

**Supplementary Fig. 7. (A) The Convolutional Neural Network architecture for SOH estimation. (B) Training and validation loss over epochs obtained by training the CNN regression model.**

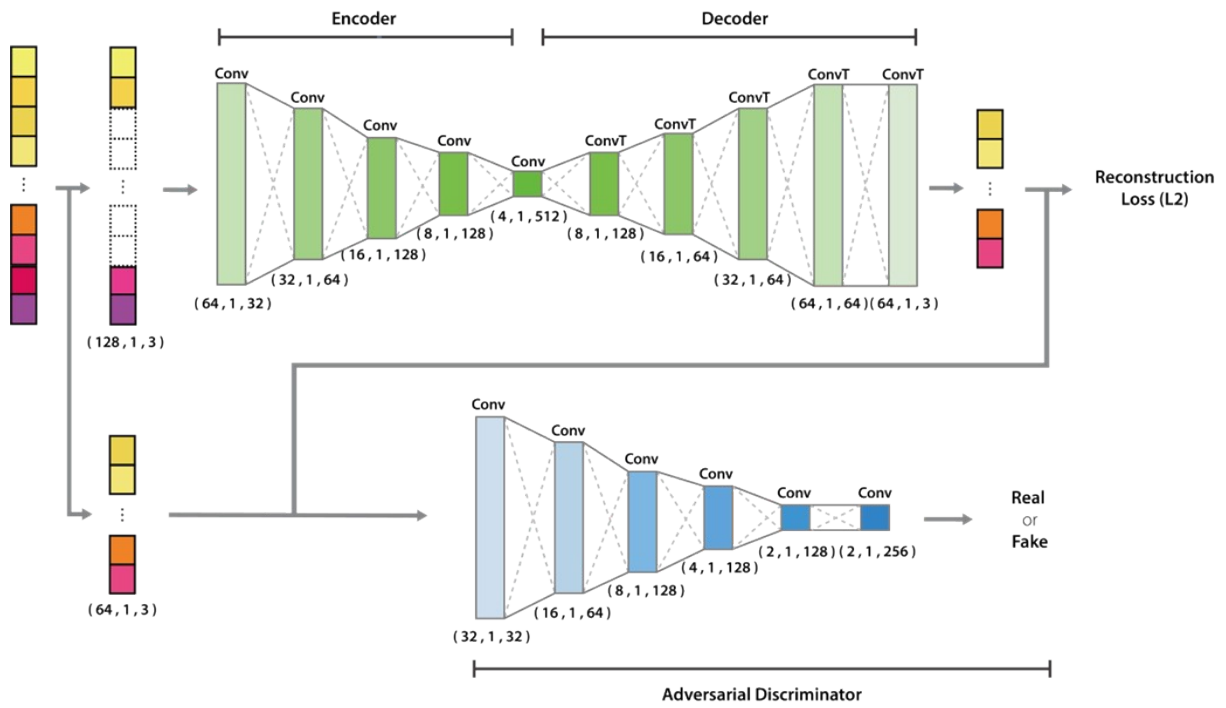

**Supplementary Fig. 8. The Context Encoders architecture for restored inpainting V, I, T - spatial channels in which the missing part accounts for 50% of the original.**

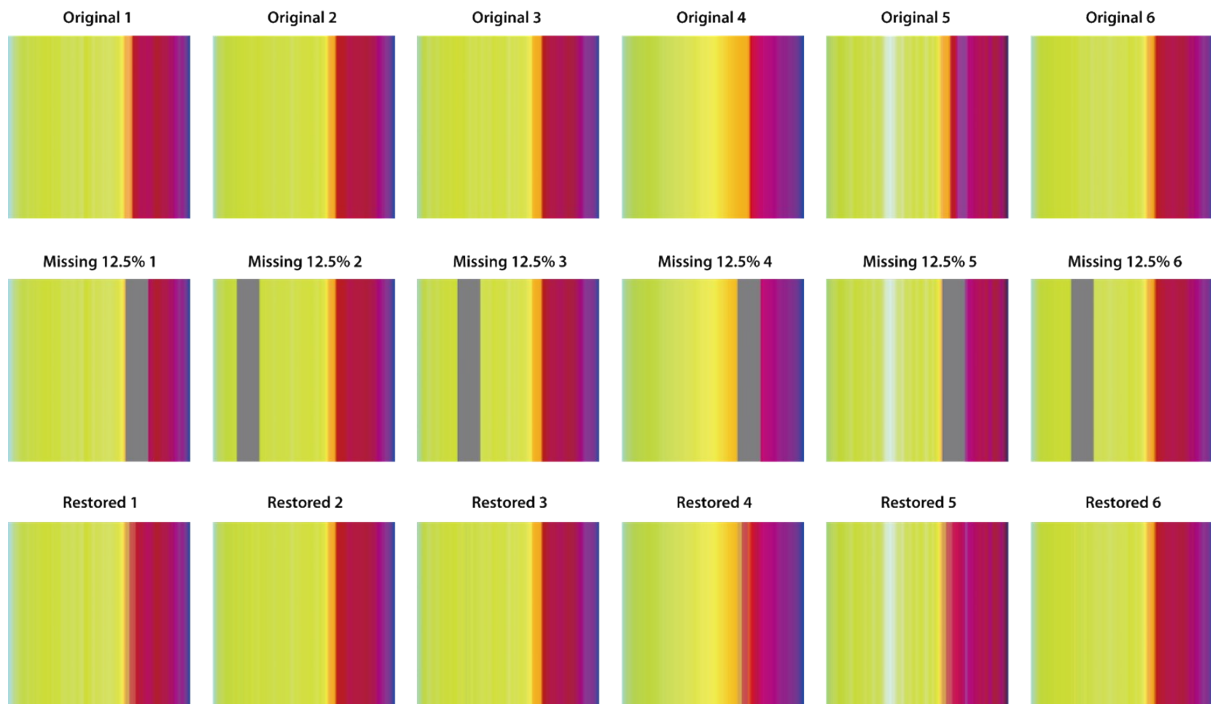

**Supplementary Fig. 9. Examples of restored 12.5% missing spatio-temporal channels by D-GELS.**

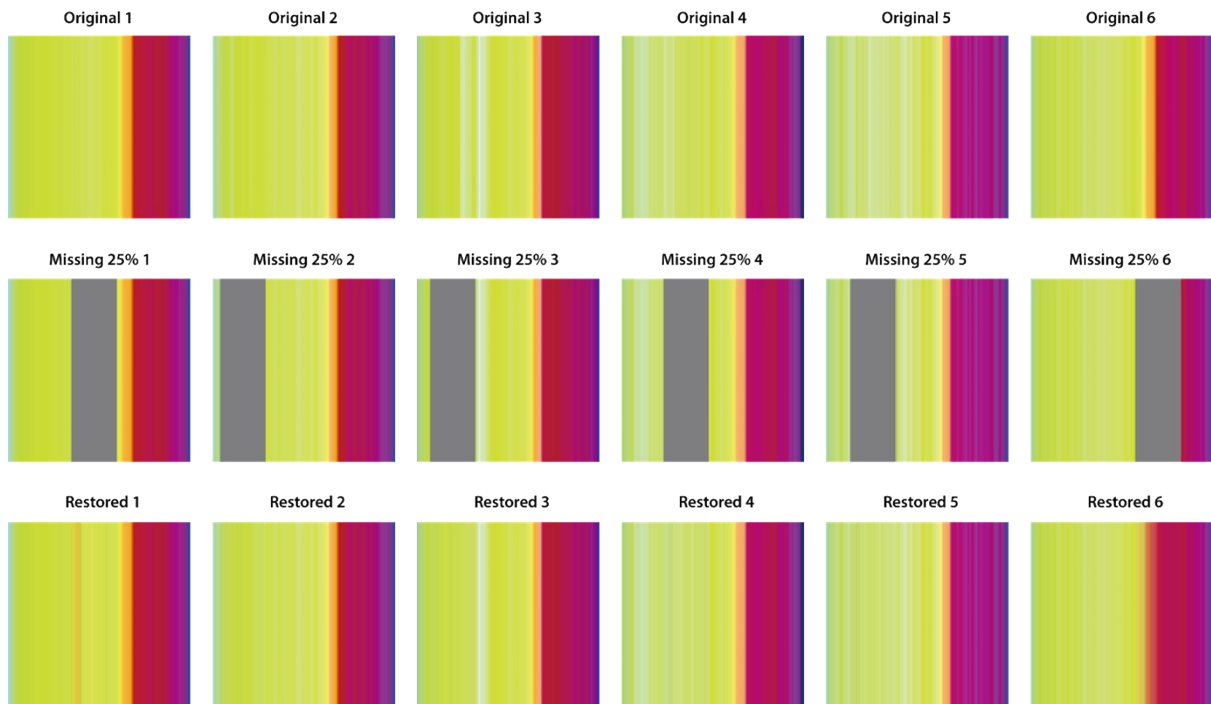

**Supplementary Fig. 10. Examples of restored 25% missing spatio-temporal channels by D-GELS.**

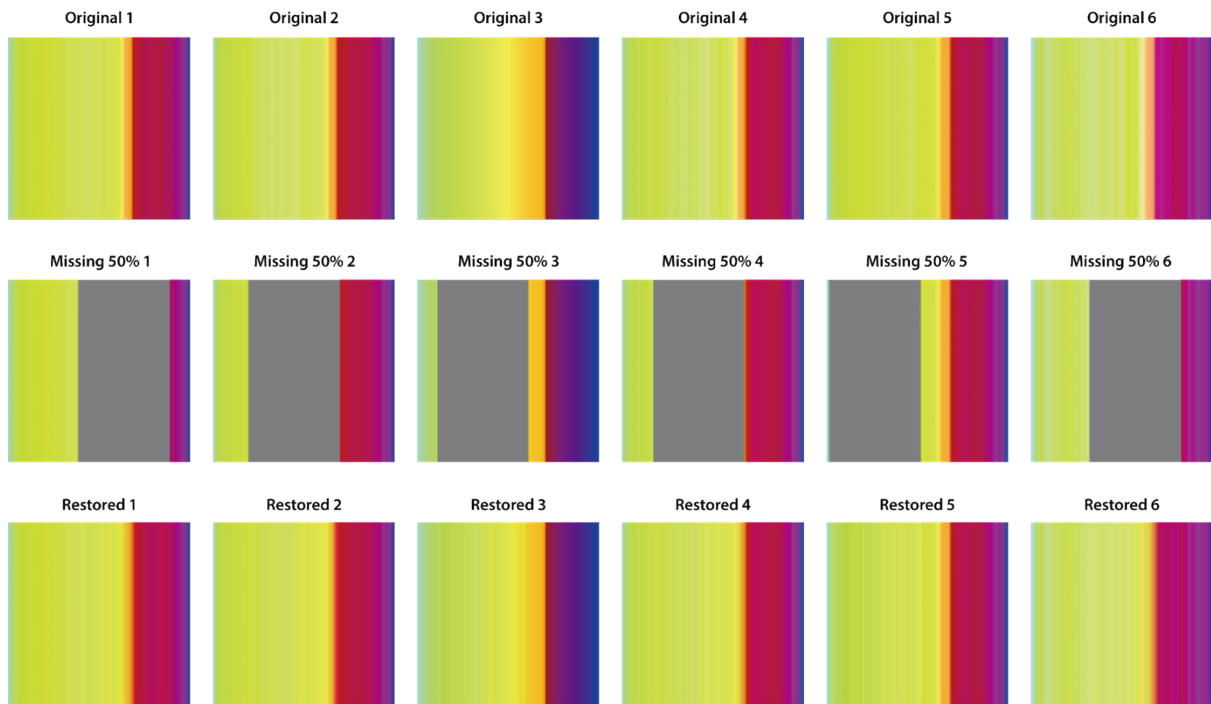

**Supplementary Fig. 11. Examples of restored 50% missing spatio-temporal channels by D-GELS.**

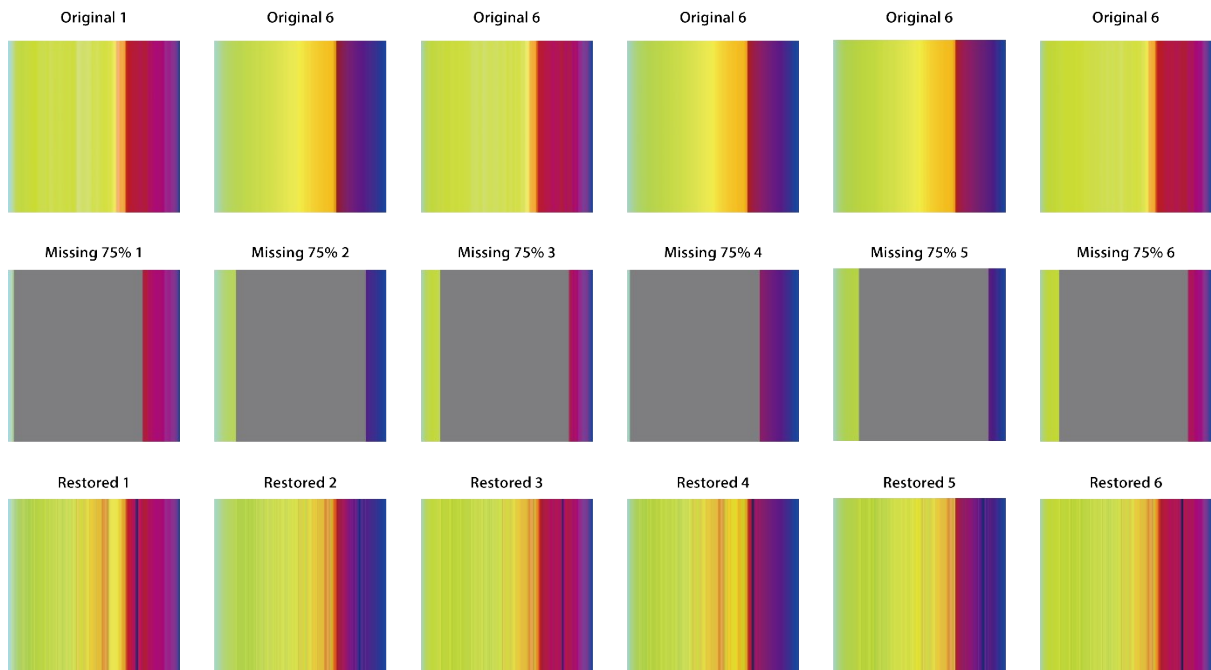

**Supplementary Fig. 12. Examples of restored 75% missing spatio-temporal channels by D-GELS.**

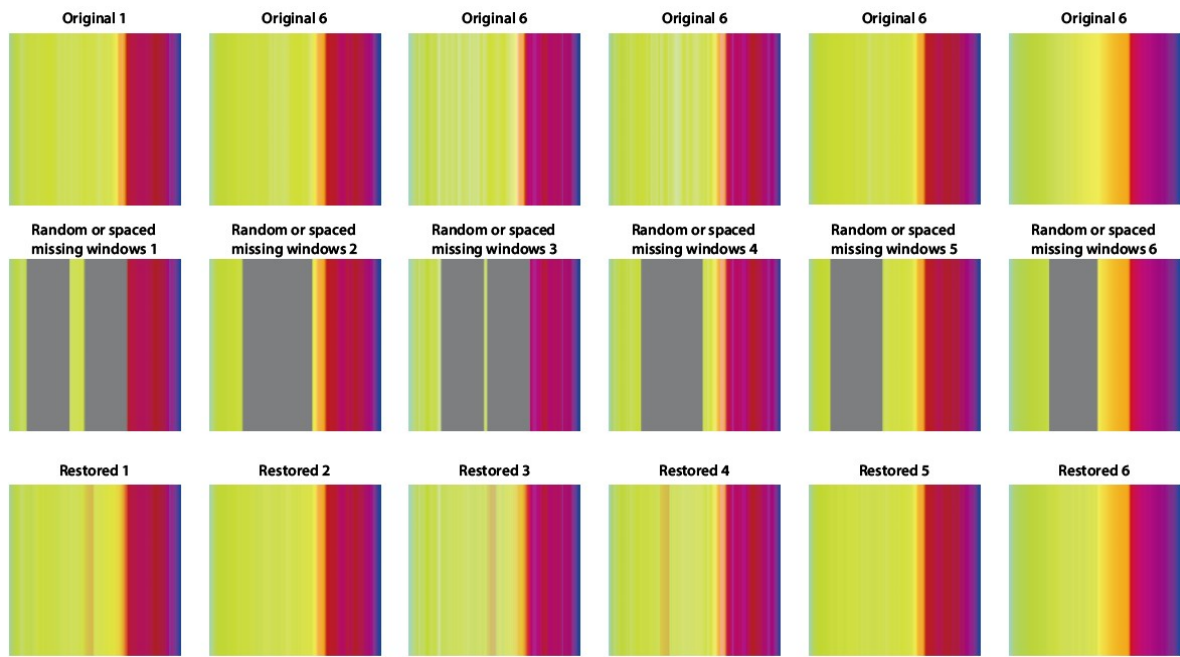

**Supplementary Fig. 13. Examples of restored random size of the missing window between 25% and 50% or two 25% missing windows randomly spaced.**

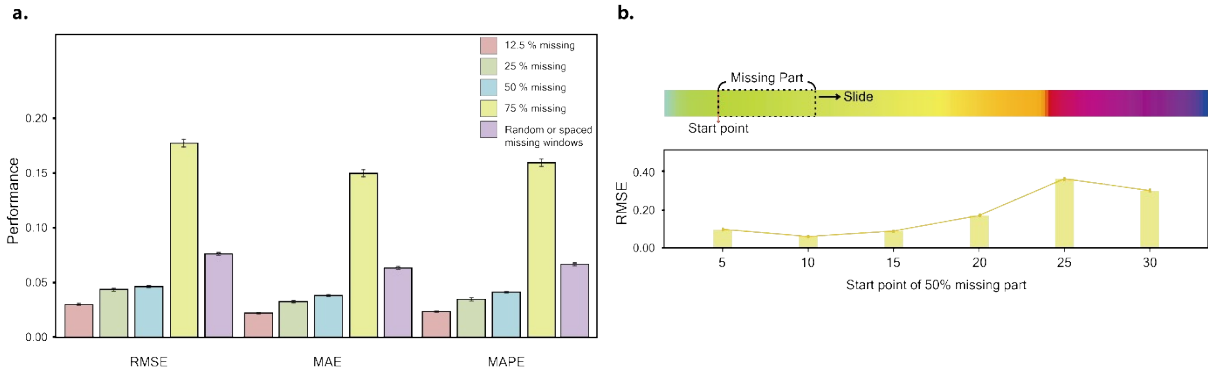

**Supplementary Fig. 14. The performance of D-GELS in SOH estimation with the restored partial-cycling profiles. (a) The performance of D-GELS in predicting SOH with partial-cycling data of 12.5%, 25%, 50% or 75% missing, or random or spaced missing windows in terms of three error metrics: RMSE, MAE, and MAPE. (b) RMSE according to the initial position of the 75% missing part as the missing window is moved across the spatio-temporal channel from start to end.**



|        | D-GELS   |          |          | LFP      |          |          | NCA      |          |          | NMC      |          |          |
|--------|----------|----------|----------|----------|----------|----------|----------|----------|----------|----------|----------|----------|
|        | RMSE     | MAE      | MAPE     |
| Try 1  | 0.010603 | 0.008417 | 0.009191 | 0.00906  | 0.00726  | 0.007585 | 0.014266 | 0.012283 | 0.014535 | 0.014182 | 0.011325 | 0.013261 |
| Try 2  | 0.008556 | 0.005599 | 0.006066 | 0.008166 | 0.00536  | 0.005606 | 0.008209 | 0.005978 | 0.007121 | 0.011019 | 0.006735 | 0.007913 |
| Try 3  | 0.008075 | 0.006386 | 0.006942 | 0.007479 | 0.006003 | 0.006277 | 0.011625 | 0.009689 | 0.011558 | 0.007176 | 0.005416 | 0.006353 |
| Try 4  | 0.009171 | 0.006931 | 0.007639 | 0.007388 | 0.005872 | 0.006124 | 0.01597  | 0.012922 | 0.015836 | 0.008915 | 0.00693  | 0.008075 |
| Try 5  | 0.007127 | 0.00535  | 0.005789 | 0.006483 | 0.004944 | 0.005153 | 0.009891 | 0.007586 | 0.008977 | 0.007599 | 0.005622 | 0.00651  |
| Try 6  | 0.008786 | 0.006896 | 0.007522 | 0.007861 | 0.006217 | 0.006502 | 0.011218 | 0.008809 | 0.010513 | 0.011136 | 0.009221 | 0.010889 |
| Try 7  | 0.007975 | 0.005995 | 0.0065   | 0.007569 | 0.005857 | 0.006129 | 0.009368 | 0.00679  | 0.008114 | 0.008838 | 0.006024 | 0.00714  |
| Try 8  | 0.00859  | 0.006429 | 0.00692  | 0.008077 | 0.006174 | 0.006415 | 0.010524 | 0.007645 | 0.008955 | 0.009512 | 0.00682  | 0.008044 |
| Try 9  | 0.010505 | 0.007578 | 0.008208 | 0.010592 | 0.007471 | 0.007846 | 0.012095 | 0.009661 | 0.011367 | 0.008003 | 0.00617  | 0.007268 |
| Try 10 | 0.009074 | 0.006766 | 0.00734  | 0.008186 | 0.006287 | 0.00655  | 0.011861 | 0.009347 | 0.011364 | 0.010691 | 0.006849 | 0.007764 |

**Supplementary Table 1. The SOH estimation performance of D-GELS, and SOH estimation performance according to cathode materials of 10 iterations.**

| Feature Type                 | State     | No. | Description                                 |
|------------------------------|-----------|-----|---------------------------------------------|
| Voltage related features     | Charge    | F1  | Initial voltage value                       |
|                              |           | F2  | Area of voltage profile                     |
|                              |           | F3  | Final voltage value                         |
|                              |           | F4  | Time at which the last voltage was measured |
|                              |           | F5  | Area of 15 points in front                  |
|                              |           | F6  | Slope of 15 points in front                 |
|                              |           | F7  | Skewness of 15 points in front              |
|                              |           | F8  | Kurtosis of 15 points in front              |
|                              | Discharge | F9  | Initial voltage value                       |
|                              |           | F10 | Area of voltage profile                     |
|                              |           | F11 | Final voltage value                         |
|                              |           | F12 | Time at which the last voltage was measured |
|                              |           | F13 | Area of 15 points behind                    |
|                              |           | F14 | Slope of 15 points behind                   |
|                              |           | F15 | Skewness of 15 points behind                |
|                              |           | F16 | Kurtosis of 15 points behind                |
| Temperature related features | Charge    | F17 | Initial temperature value                   |
|                              |           | F18 | Area of temperature profile                 |
|                              |           | F19 | Slope of temperature profile                |
|                              |           | F20 | Final temperature value                     |
|                              |           | F21 | Area of initial 15 points in front          |
|                              |           | F22 | Slope of initial 15 points in front         |
|                              |           | F23 | Skewness of initial 15 points in front      |
|                              |           | F24 | Kurtosis of initial 15 points in front      |
|                              | Discharge | F25 | Area of temperature profile                 |
|                              |           | F26 | Slope of temperature profile                |
|                              |           | F27 | Area of initial 15 points in front          |
|                              |           | F28 | Slope of initial 15 points in front         |
|                              |           | F29 | Skewness of initial 15 points in front      |
|                              |           | F30 | Kurtosis of initial 15 points in front      |
| IC related features          | Charge    | F31 | Final temperature value                     |
|                              |           | F32 | Global peak value of IC curve               |
|                              |           | F33 | Time at which the global peak was measured  |
|                              |           | F34 | Local peak value of IC curve                |
|                              |           | F35 | Time at which the local peak was measured   |

**Supplementary Table 2. The extracted features for the traditional method of SOH prediction.**

|                    |      | Before Selection (35) | Filter Method (10)                                     | Feature Selector (7)                  | PCA (8)                                    | ElasticNet (6)                |
|--------------------|------|-----------------------|--------------------------------------------------------|---------------------------------------|--------------------------------------------|-------------------------------|
| Selected Features  |      | F1 - F35              | F2, F4, F7,<br>F12, F23, F24,<br>F29, F30, F33,<br>F34 | F4, F6, F12,<br>F14, F15, F18,<br>F35 | F4, F6, F20,<br>F23, F24, F29,<br>F30, F35 | F2, F4, F12,<br>F25, F33, F35 |
| KNN<br>Performance | RMSE | 0.008107              | 0.009912                                               | 0.005196                              | 0.015226                                   | 0.005321                      |
|                    | MAE  | 0.005011              | 0.007167                                               | 0.001829                              | 0.008614                                   | 0.002196                      |
|                    | MAPE | 0.005408              | 0.007688                                               | 0.002054                              | 0.009360                                   | 0.002471                      |

**Supplementary Table 3. The selected features with Filter Method, Feature Selector, PCA, and ElasticNet, and the SOH estimation performance of KNN. The number of selected features is written in brackets and the feature list is shown in the Supplementary Table 2.**

| label  | data | rmse     | mse      | mae      | mape     |
|--------|------|----------|----------|----------|----------|
| GPR    | tot  | 0.006857 | 4.70E-05 | 0.005011 | 0.005435 |
|        | 15C  | 0.251524 | 0.063265 | 0.237577 | 0.259436 |
|        | 35C  | 0.135292 | 0.018304 | 0.128125 | 0.142125 |
| SGD    | tot  | 0.022219 | 0.000494 | 0.01622  | 0.0179   |
|        | 15C  | 0.143255 | 0.020522 | 0.136567 | 0.148579 |
|        | 35C  | 0.129893 | 0.016872 | 0.128152 | 0.14145  |
| RF     | tot  | 0.007298 | 5.33E-05 | 0.004515 | 0.00489  |
|        | 15C  | 0.045599 | 0.002079 | 0.040085 | 0.042773 |
|        | 35C  | 0.081192 | 0.006592 | 0.071445 | 0.077452 |
| NuSVR  | tot  | 0.013635 | 0.000186 | 0.008818 | 0.009679 |
|        | 15C  | 0.167027 | 0.027898 | 0.137356 | 0.153879 |
|        | 35C  | 0.181844 | 0.033067 | 0.179002 | 0.19887  |
| D-GELS | tot  | 0.008846 | 7.93E-05 | 0.006634 | 0.007211 |
|        | 15C  | 0.031466 | 0.000990 | 0.019413 | 0.020985 |
|        | 35C  | 0.030541 | 0.000933 | 0.028264 | 0.031409 |

**Supplementary Table 4. The SOH estimation performance of GPR, SGD, RF, and NuSVR with selected features, and D-GELS.**

|        | RMSE     |          |          |          |          | MAE      |          |          |          |          | MAPE     |          |          |          |          |
|--------|----------|----------|----------|----------|----------|----------|----------|----------|----------|----------|----------|----------|----------|----------|----------|
|        | 12.5%    | 25%      | 50%      | 75%      | random   | 12.5%    | 25%      | 50%      | 75%      | random   | 12.5%    | 25%      | 50%      | 75%      | random   |
| Try 1  | 0.030349 | 0.039853 | 0.046976 | 0.182831 | 0.076835 | 0.021731 | 0.028682 | 0.038925 | 0.159354 | 0.062298 | 0.023185 | 0.030497 | 0.041977 | 0.169591 | 0.066133 |
| Try 2  | 0.028050 | 0.042943 | 0.042886 | 0.176285 | 0.075828 | 0.022009 | 0.032017 | 0.034929 | 0.151094 | 0.062372 | 0.023434 | 0.034222 | 0.037988 | 0.16154  | 0.066288 |
| Try 3  | 0.029138 | 0.044936 | 0.047358 | 0.167782 | 0.079222 | 0.022036 | 0.034404 | 0.038160 | 0.139189 | 0.064131 | 0.023757 | 0.036924 | 0.041407 | 0.148842 | 0.067716 |
| Try 4  | 0.027773 | 0.044853 | 0.047227 | 0.185845 | 0.076663 | 0.022412 | 0.033397 | 0.038699 | 0.153477 | 0.063289 | 0.023951 | 0.035605 | 0.041869 | 0.163555 | 0.067439 |
| Try 5  | 0.030632 | 0.039372 | 0.046397 | 0.179705 | 0.07844  | 0.022470 | 0.030238 | 0.037553 | 0.152245 | 0.061866 | 0.024405 | 0.032170 | 0.040104 | 0.160857 | 0.065608 |
| Try 6  | 0.031811 | 0.045224 | 0.047805 | 0.176973 | 0.079562 | 0.022720 | 0.034574 | 0.039529 | 0.14845  | 0.066759 | 0.024628 | 0.036743 | 0.042535 | 0.160367 | 0.071291 |
| Try 7  | 0.030236 | 0.044592 | 0.047350 | 0.17531  | 0.079142 | 0.021692 | 0.029779 | 0.040024 | 0.148498 | 0.065507 | 0.023403 | 0.031959 | 0.043095 | 0.156458 | 0.070439 |
| Try 8  | 0.031689 | 0.044793 | 0.047674 | 0.167983 | 0.072641 | 0.022821 | 0.034567 | 0.039606 | 0.1436   | 0.060136 | 0.024251 | 0.036972 | 0.042327 | 0.153418 | 0.063954 |
| Try 9  | 0.027439 | 0.045471 | 0.046517 | 0.184385 | 0.07444  | 0.019735 | 0.035234 | 0.038822 | 0.153024 | 0.061366 | 0.020936 | 0.037570 | 0.041737 | 0.161211 | 0.065252 |
| Try 10 | 0.032601 | 0.045696 | 0.044751 | 0.178507 | 0.075252 | 0.023518 | 0.033826 | 0.036603 | 0.149516 | 0.06225  | 0.025203 | 0.036023 | 0.040219 | 0.159178 | 0.06616  |

**Supplementary Table 5. The SOH estimation performance of D-GELS with restored 12.5%, 25%, 50%, or 75%, or random or spaced missing windows.**

|        | 5        | 10       | 15       | 20       | 25       | 30       | 35       | 40       | 45       | 50       | 55       | 60       | 65       | 70       | 75       | 80       | 85       | 90       | 95       | 100      | 105      |
|--------|----------|----------|----------|----------|----------|----------|----------|----------|----------|----------|----------|----------|----------|----------|----------|----------|----------|----------|----------|----------|----------|
| Try 1  | 0.019317 | 0.018602 | 0.020862 | 0.010077 | 0.012148 | 0.011513 | 0.029388 | 0.02455  | 0.019365 | 0.023106 | 0.033377 | 0.040702 | 0.126208 | 0.062993 | 0.019894 | 0.018129 | 0.026601 | 0.008566 | 0.018753 | 0.011135 | 0.032126 |
| Try 2  | 0.019178 | 0.01878  | 0.020635 | 0.009981 | 0.012282 | 0.011596 | 0.02923  | 0.024329 | 0.019698 | 0.02286  | 0.034133 | 0.042278 | 0.126004 | 0.062227 | 0.020052 | 0.016762 | 0.026008 | 0.008603 | 0.019459 | 0.011499 | 0.032796 |
| Try 3  | 0.018194 | 0.018618 | 0.019327 | 0.01097  | 0.012502 | 0.011514 | 0.029897 | 0.023983 | 0.019548 | 0.02328  | 0.034471 | 0.042038 | 0.124161 | 0.061874 | 0.020392 | 0.01819  | 0.027624 | 0.008562 | 0.019152 | 0.011784 | 0.032043 |
| Try 4  | 0.017944 | 0.018575 | 0.019994 | 0.010998 | 0.012255 | 0.011524 | 0.029835 | 0.024406 | 0.018881 | 0.022518 | 0.03419  | 0.040627 | 0.124717 | 0.063581 | 0.02058  | 0.018182 | 0.026923 | 0.009019 | 0.01936  | 0.011648 | 0.032114 |
| Try 5  | 0.019115 | 0.017906 | 0.020685 | 0.009457 | 0.012365 | 0.011424 | 0.030159 | 0.023855 | 0.019807 | 0.022032 | 0.033729 | 0.041978 | 0.125596 | 0.062854 | 0.018917 | 0.016651 | 0.028097 | 0.008861 | 0.017651 | 0.011889 | 0.032606 |
| Try 6  | 0.019034 | 0.018664 | 0.020566 | 0.010782 | 0.011669 | 0.011374 | 0.029697 | 0.02428  | 0.019984 | 0.022863 | 0.033328 | 0.041993 | 0.126003 | 0.06179  | 0.019501 | 0.018219 | 0.027461 | 0.008286 | 0.019127 | 0.011905 | 0.032559 |
| Try 7  | 0.019118 | 0.019206 | 0.02089  | 0.009916 | 0.012091 | 0.011695 | 0.028924 | 0.023672 | 0.019985 | 0.023229 | 0.034046 | 0.042334 | 0.122947 | 0.063528 | 0.019898 | 0.017849 | 0.027567 | 0.008892 | 0.01795  | 0.010601 | 0.032111 |
| Try 8  | 0.019139 | 0.018926 | 0.019964 | 0.010845 | 0.012734 | 0.011037 | 0.028788 | 0.0244   | 0.019689 | 0.023272 | 0.033588 | 0.041998 | 0.124236 | 0.06296  | 0.020411 | 0.01715  | 0.026081 | 0.008098 | 0.018638 | 0.01198  | 0.032342 |
| Try 9  | 0.019116 | 0.019031 | 0.020456 | 0.009923 | 0.011684 | 0.011243 | 0.030055 | 0.024384 | 0.019832 | 0.022062 | 0.034403 | 0.040404 | 0.125697 | 0.062302 | 0.020158 | 0.018092 | 0.027974 | 0.008668 | 0.019518 | 0.01052  | 0.033048 |
| Try 10 | 0.018703 | 0.018392 | 0.019755 | 0.01034  | 0.011633 | 0.011726 | 0.02971  | 0.02363  | 0.0197   | 0.021511 | 0.033775 | 0.042444 | 0.123539 | 0.063769 | 0.019705 | 0.018155 | 0.026576 | 0.009054 | 0.018699 | 0.010308 | 0.031712 |

**Supplementary Table 6. The results of D-GELS according to starting position of the 12.5% missing part.**

|        | 5        | 10       | 15       | 20       | 25       | 30       | 35       | 40       | 45       | 50       | 55       | 60       | 65       | 70       | 75       | 80       | 85       | 90       |
|--------|----------|----------|----------|----------|----------|----------|----------|----------|----------|----------|----------|----------|----------|----------|----------|----------|----------|----------|
| Try 1  | 0.014342 | 0.014058 | 0.012064 | 0.011809 | 0.009857 | 0.016    | 0.047665 | 0.046779 | 0.042195 | 0.053697 | 0.06418  | 0.07872  | 0.117032 | 0.01998  | 0.019592 | 0.066447 | 0.082157 | 0.012747 |
| Try 2  | 0.013646 | 0.014287 | 0.011458 | 0.012371 | 0.010675 | 0.016547 | 0.047626 | 0.0469   | 0.040344 | 0.053558 | 0.060647 | 0.078092 | 0.117056 | 0.020824 | 0.021074 | 0.065278 | 0.081317 | 0.013457 |
| Try 3  | 0.015086 | 0.01396  | 0.01225  | 0.012827 | 0.00975  | 0.016721 | 0.047057 | 0.045667 | 0.042324 | 0.052246 | 0.064213 | 0.079378 | 0.119007 | 0.021321 | 0.019218 | 0.066425 | 0.08105  | 0.012315 |
| Try 4  | 0.013972 | 0.014252 | 0.012707 | 0.012178 | 0.010981 | 0.016627 | 0.047482 | 0.044087 | 0.04196  | 0.053281 | 0.065045 | 0.079199 | 0.116974 | 0.019615 | 0.02164  | 0.065998 | 0.077932 | 0.014448 |
| Try 5  | 0.015583 | 0.014311 | 0.012594 | 0.011501 | 0.010389 | 0.015558 | 0.047537 | 0.044633 | 0.039149 | 0.053342 | 0.064343 | 0.079679 | 0.117496 | 0.021258 | 0.021699 | 0.066709 | 0.081769 | 0.014298 |
| Try 6  | 0.015478 | 0.013921 | 0.012636 | 0.012439 | 0.009879 | 0.016525 | 0.047614 | 0.045675 | 0.042406 | 0.05198  | 0.064447 | 0.077992 | 0.118539 | 0.020105 | 0.0217   | 0.065845 | 0.081059 | 0.013681 |
| Try 7  | 0.015244 | 0.013247 | 0.01184  | 0.012078 | 0.011088 | 0.015933 | 0.046684 | 0.046788 | 0.041566 | 0.053362 | 0.058602 | 0.07791  | 0.114578 | 0.020637 | 0.021923 | 0.064364 | 0.080375 | 0.014473 |
| Try 8  | 0.015108 | 0.013437 | 0.012126 | 0.012116 | 0.009751 | 0.015967 | 0.046429 | 0.045937 | 0.042003 | 0.052698 | 0.063517 | 0.07872  | 0.119703 | 0.019066 | 0.020324 | 0.065274 | 0.081535 | 0.013507 |
| Try 9  | 0.014175 | 0.01444  | 0.012528 | 0.01286  | 0.010988 | 0.016387 | 0.047425 | 0.047038 | 0.041972 | 0.052868 | 0.064609 | 0.079198 | 0.119821 | 0.019697 | 0.021529 | 0.066557 | 0.081029 | 0.013713 |
| Try 10 | 0.014459 | 0.013798 | 0.011546 | 0.012472 | 0.010541 | 0.016809 | 0.047793 | 0.046746 | 0.041566 | 0.052763 | 0.062398 | 0.07876  | 0.117336 | 0.020699 | 0.021449 | 0.063379 | 0.081495 | 0.014875 |

**Supplementary Table 7. The results of D-GELS according to starting position of the 25% missing part.**

|        | 5        | 10       | 15       | 20       | 25       | 30       | 35       | 40       | 45       | 50       | 55       |
|--------|----------|----------|----------|----------|----------|----------|----------|----------|----------|----------|----------|
| Try 1  | 0.01783  | 0.017142 | 0.020867 | 0.043507 | 0.072168 | 0.046794 | 0.049099 | 0.066564 | 0.058449 | 0.040213 | 0.052551 |
| Try 2  | 0.017262 | 0.017208 | 0.023876 | 0.042145 | 0.071398 | 0.047629 | 0.049309 | 0.067232 | 0.058861 | 0.041836 | 0.051638 |
| Try 3  | 0.017961 | 0.0165   | 0.022536 | 0.041123 | 0.071022 | 0.047001 | 0.04557  | 0.066185 | 0.058734 | 0.04161  | 0.049836 |
| Try 4  | 0.017683 | 0.01747  | 0.021793 | 0.042934 | 0.070789 | 0.049515 | 0.047629 | 0.065631 | 0.059044 | 0.040728 | 0.050389 |
| Try 5  | 0.017908 | 0.016601 | 0.023755 | 0.042777 | 0.069093 | 0.048835 | 0.048476 | 0.066659 | 0.058571 | 0.040493 | 0.052411 |
| Try 6  | 0.018242 | 0.017502 | 0.025122 | 0.042878 | 0.070705 | 0.049305 | 0.049463 | 0.065693 | 0.056409 | 0.04111  | 0.052354 |
| Try 7  | 0.017847 | 0.017733 | 0.023597 | 0.042708 | 0.072114 | 0.047754 | 0.048373 | 0.064791 | 0.059262 | 0.040468 | 0.052362 |
| Try 8  | 0.017526 | 0.015007 | 0.024769 | 0.043463 | 0.071473 | 0.050032 | 0.048786 | 0.066679 | 0.060043 | 0.04005  | 0.053219 |
| Try 9  | 0.01804  | 0.015817 | 0.026176 | 0.042312 | 0.070456 | 0.049657 | 0.047594 | 0.065652 | 0.058769 | 0.041491 | 0.051643 |
| Try 10 | 0.017789 | 0.017663 | 0.026085 | 0.042227 | 0.070092 | 0.049301 | 0.048095 | 0.066077 | 0.059353 | 0.039745 | 0.051413 |

**Supplementary Table 8. The results of D-GELS according to starting position of the 50% missing part.**



|        | 5        | 10       | 15       | 20       | 25       | 30       |
|--------|----------|----------|----------|----------|----------|----------|
| Try 1  | 0.099485 | 0.060432 | 0.090815 | 0.172597 | 0.363521 | 0.301648 |
| Try 2  | 0.099768 | 0.061444 | 0.093085 | 0.173174 | 0.360603 | 0.294038 |
| Try 3  | 0.10092  | 0.065614 | 0.086964 | 0.171891 | 0.362239 | 0.29829  |
| Try 4  | 0.10251  | 0.065594 | 0.092086 | 0.172808 | 0.36303  | 0.301753 |
| Try 5  | 0.10132  | 0.06427  | 0.093254 | 0.169041 | 0.359488 | 0.301406 |
| Try 6  | 0.101758 | 0.064309 | 0.092779 | 0.171545 | 0.36189  | 0.300778 |
| Try 7  | 0.099287 | 0.063092 | 0.093614 | 0.17169  | 0.361841 | 0.300873 |
| Try 8  | 0.102382 | 0.064656 | 0.092274 | 0.173279 | 0.360915 | 0.299602 |
| Try 9  | 0.101485 | 0.06542  | 0.092924 | 0.170282 | 0.356515 | 0.3017   |
| Try 10 | 0.101209 | 0.064232 | 0.093593 | 0.172862 | 0.360589 | 0.299104 |

**Supplementary Table 9. The results of D-GELS according to starting position of the 75% missing part.**

|     |                                              | Time (minute) | Cost (€) |
|-----|----------------------------------------------|---------------|----------|
|     | Inspection and handling                      | 60            | 100      |
|     | Connection of the electrical test equipment  | 10            | 17       |
|     | Initial voltage set and balance              | 100           | 83       |
|     | Battery characterization                     | -             | 208      |
|     | Disconnection from electrical test equipment | 10            | 17       |
|     | Final inspection                             | 10            | 17       |
| LFP | 50%                                          | 82.02         | -        |
|     | 75%                                          | 124.03        | -        |
|     | 100%                                         | 183.35        | -        |
| NCA | 50%                                          | 62.02         | -        |
|     | 75%                                          | 94.02         | -        |
|     | 100%                                         | 149.95        | -        |
| NMC | 50%                                          | 56.02         | -        |
|     | 75%                                          | 86.02         | -        |
|     | 100%                                         | 139.20        | -        |

**Supplementary Table 10. Economic and technical parameters.**
